# Supplementary material for: Transport pathways and kinetics of cerebrospinal fluid tracers in mouse brain observed by dynamic contrast-enhanced MRI
Source: PubMed Central journal article supplement (PMC10449788; doi:10.1038/s41598-023-40896-x), 2023-08-24
Supplement: 41598_2023_40896_MOESM1_ESM.pdf [file 41598_2023_40896_MOESM1_ESM.pdf]

## Scientific Reports

### Transport Pathways and Kinetics of Cerebrospinal Fluid Tracers in Mouse Brain Observed by Dynamic Contrast-Enhanced MRI

Yuran Zhu<sup>1</sup>, Guanhua Wang<sup>2</sup>, Chaitanya Kolluru<sup>1</sup>, Yuning Gu<sup>1</sup>, Huiyun Gao<sup>3,4</sup>, Jing Zhang<sup>5</sup>,  
Yunmei Wang<sup>3,4</sup>, David L. Wilson<sup>1,6</sup>, Xiaofeng Zhu<sup>5</sup>, Chris A. Flask<sup>1,6,7</sup>, Xin Yu<sup>1,6,8</sup>

<sup>1</sup>Department of Biomedical Engineering, Case Western Reserve University, Cleveland, Ohio, USA

<sup>2</sup>Department of Biomedical Engineering, University of Michigan, Ann Arbor, Michigan, USA

<sup>3</sup>Cardiovascular Research Institute, Case Western Reserve University, Cleveland, Ohio, USA

<sup>4</sup>Department of Medicine, Case Western Reserve University, Cleveland, Ohio, USA

<sup>5</sup>Department of Biostatistics, Population and Quantitative Health Sciences, Case Western Reserve University, Cleveland, Ohio, USA

<sup>6</sup>Department of Radiology, Case Western Reserve University, Cleveland, Ohio, USA

<sup>7</sup>Department of Pediatrics, Case Western Reserve University, Cleveland, Ohio, USA

<sup>8</sup>Department of Physiology and Biophysics, Case Western Reserve University, Cleveland, Ohio, USA

**Running headline: Transport of CSF tracers in mouse brain**

Address correspondence to:

Xin Yu, Sc.D.,  
Wickenden 430  
10900 Euclid Avenue  
Cleveland, OH 44106, USA  
Tel: 216-368-3918  
Email: xin.yu@case.edu

## Scientific Reports

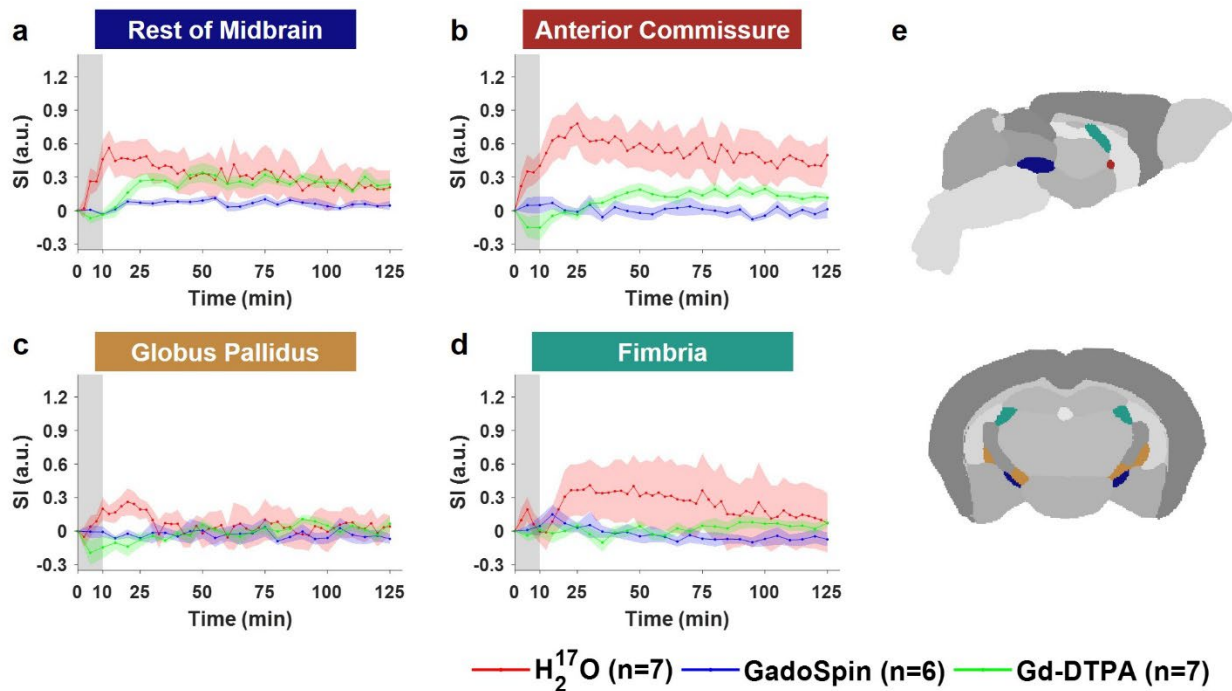

**Fig. S1** Contrast agent transport in the rest of midbrain, anterior commissure, globus pallidus, and fimbria. **a-d**: Time courses of signal changes in the selected ROIs. Gray bands indicate the period of contrast agent infusion. Red, blue, and green lines represent the mean time courses of signal changes induced by  $H_2^{17}O$ , GadoSpin, and Gd-DTPA, respectively. Shaded areas represent standard errors. **e**: Segmentation of selected ROIs.

Scientific Reports

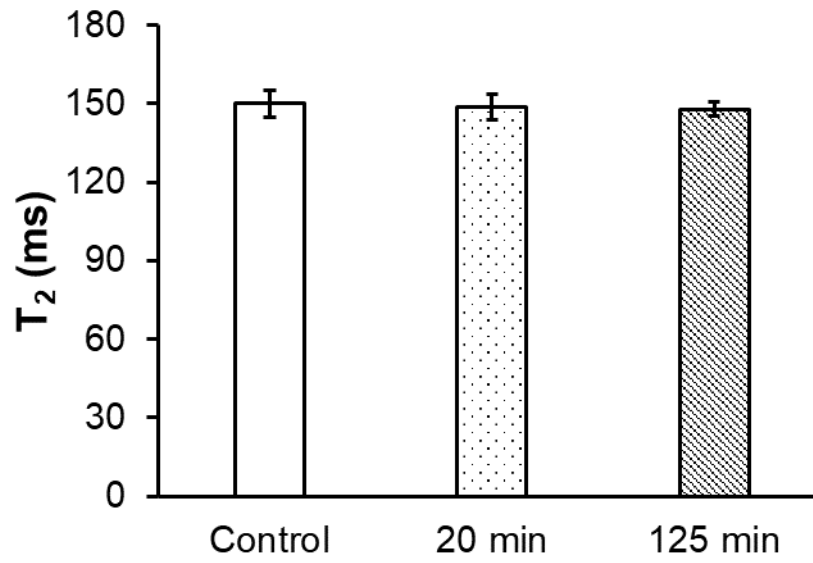

**Fig. S2** T<sub>2</sub> of plasma from mice without H<sub>2</sub><sup>17</sup>O infusion (control) and at 20 and 125 min after H<sub>2</sub><sup>17</sup>O infusion.

**a**

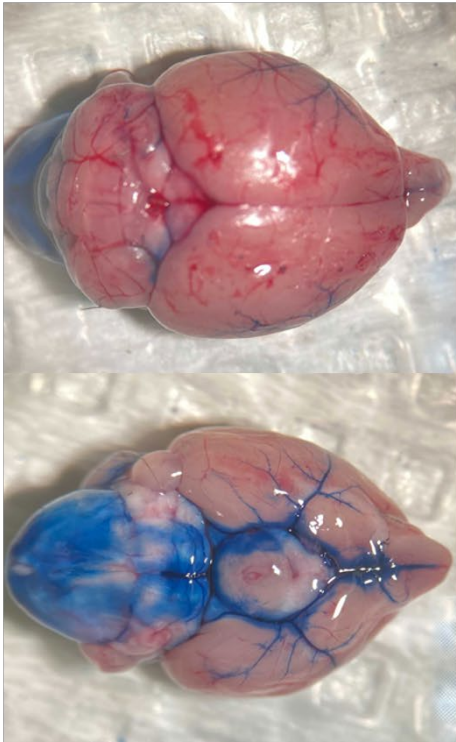

**b**

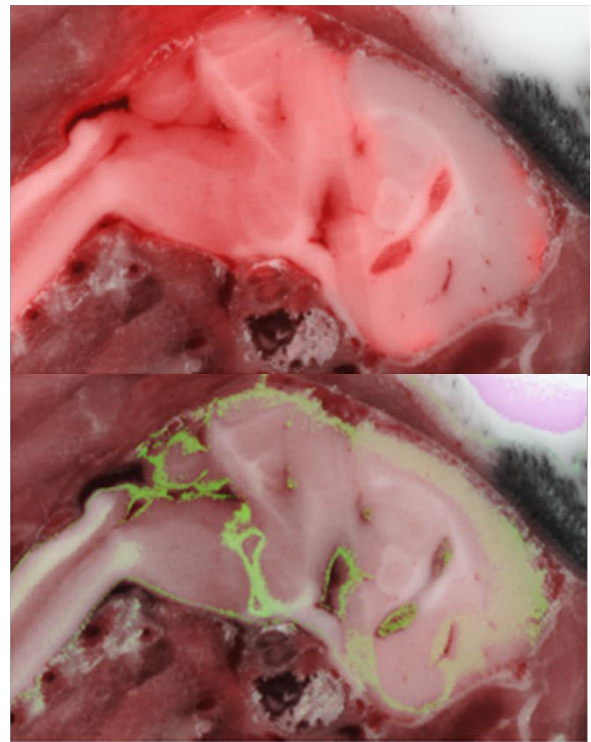

**Fig. S3** Validation of intracisternal tracer delivery. **a:** Bright-field microscopy of Evans blue staining. Top: dorsal view; bottom: ventral view. **b:** Cryoimaging of co-injected CF594 hydrazide (MW=740 Da, red, top) and FITC-dextran (MW=2,000 kDa, green, bottom). CF594 hydrazide showed penetration into the parenchyma while Evans blue and FITC-dextran were confined to the subarachnoid and perivascular spaces.

## Scientific Reports

**Table. S1** Volumes of each region-of-interest.

| <b>Structure Name</b> | <b>Volume (mm<sup>3</sup>)</b> |
|-----------------------|--------------------------------|
| Whole Brain           | 493.2                          |
| Neocortex             | 165.4                          |
| Brain Stem            | 73.6                           |
| Cerebellum            | 63.5                           |
| Olfactory Bulbs       | 31.1                           |
| Thalamus              | 25.8                           |
| Caudate Putamen       | 24.5                           |
| Hippocampus           | 24.4                           |
| Basal Forebrain       | 13.3                           |
| Rest of Midbrain      | 12.9                           |
| Amygdala              | 12.4                           |
| Hypothalamus          | 12.3                           |
| CC & EC               | 8.6                            |
| Superior Colliculi    | 8.2                            |
| Inferior Colliculi    | 5.2                            |
| Central Gray          | 3.9                            |
| Globus Pallidus       | 2.6                            |
| Internal Capsule      | 2.0                            |
| Fimbria               | 2.0                            |
| Lateral Ventricles    | 1.0                            |
| Anterior Commissure   | 0.6                            |
